# Supplementary material for: Transient non-specific DNA binding dominates the target search of bacterial DNA-binding proteins
Source: PubMed Central journal article supplement (PMC8022225; doi:10.1016/j.molcel.2021.01.039), 2021-04-01
Supplement: mmc1.pdf [file mmc1.pdf]

**Molecular Cell, Volume 81**

**Supplemental information**

**Transient non-specific DNA binding  
dominates the target search  
of bacterial DNA-binding proteins**

**Mathew Stracy, Jakob Schweizer, David J. Sherratt, Achillefs N. Kapanidis, Stephan Uphoff, and Christian Lesterlin**

## **SUPPLEMENTAL ITEMS:**

**Figure S1:** DNA-binding proteins diffusion analysis. Related to Fig. 1 and 2.

**Figure S2:** Quantification of DNA degradation efficiency. Related to Fig. 3.

**Figure S3:** Min oscillation period analysis. Related to Fig. 3E.

**Figure S4:** Effects of chromosome degradation on protein production and diffusion. Related to Fig. 3.

**Figure S5:** Identification of DNA-free cells. Related to Fig. 3 and 4.

**Figure S6:** Influence of exposure time. Related to Fig. 6.

**Table S1:** Functionality of the tested fusion proteins. Related to Fig. 1 and Table 1.

**Table S2:** Strains and plasmids used in this study. Related to the STAR methods section.

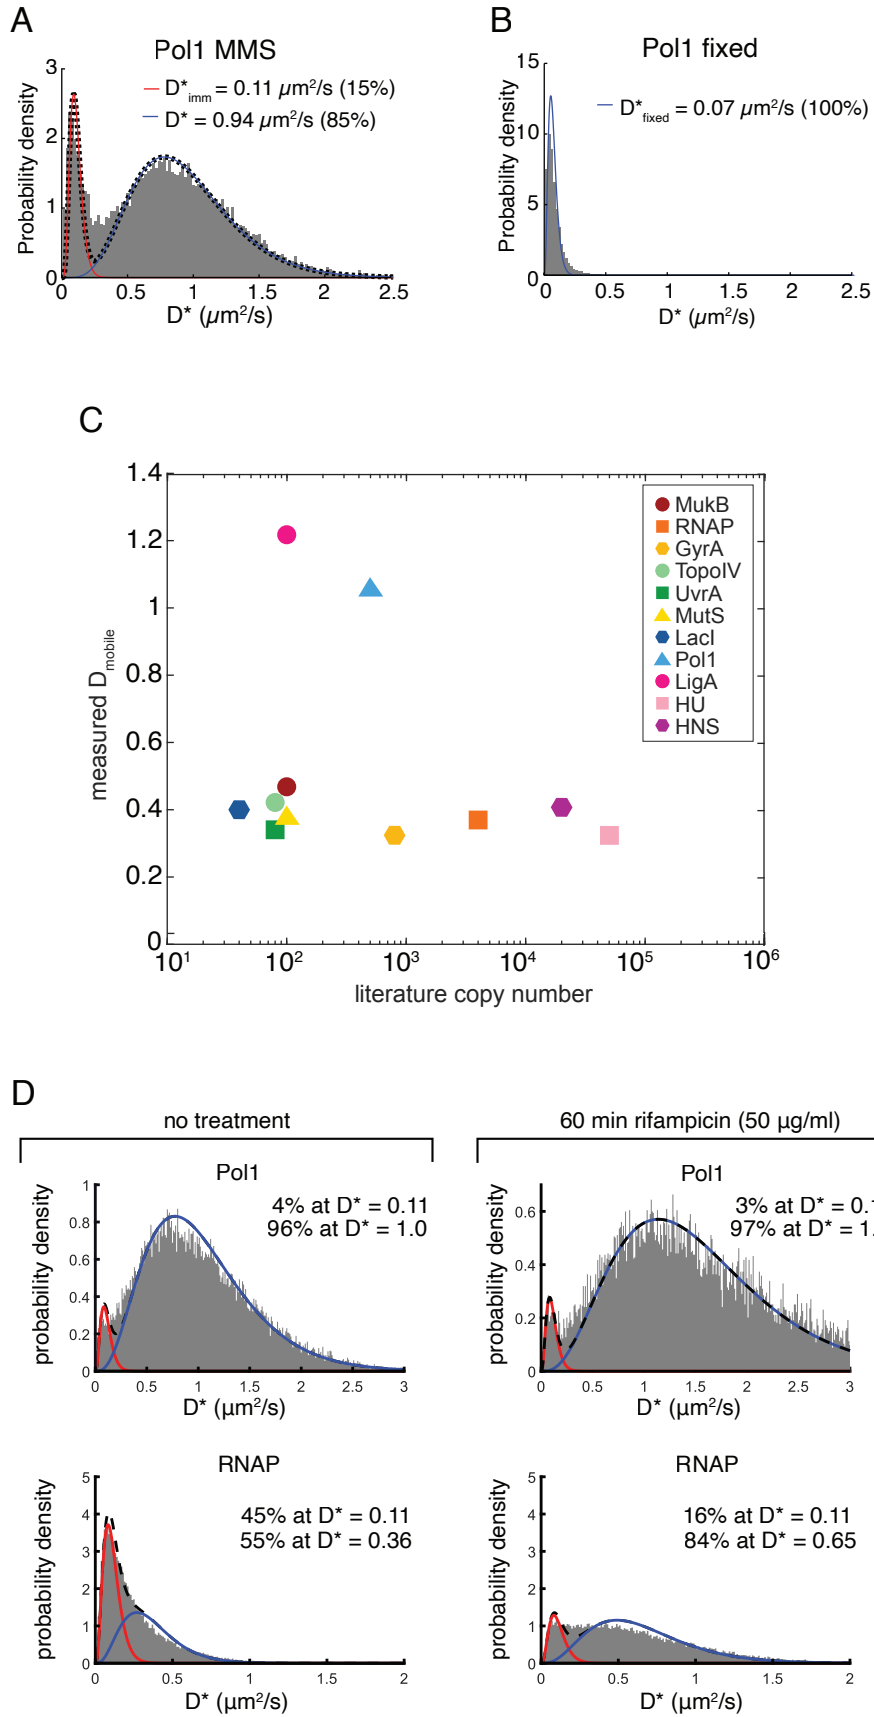

Figure S1

**Figure S1:** DNA-binding proteins diffusion analysis. Related to Fig. 1 and 2. (A)  $D^*$  histograms and model fit of PolA-PAmCherry in cells treated with methyl methanesulfonate (MMS). (B)  $D^*$  histograms of PolA-PAmCherry in fixed cells, fitted with a model of immobile molecules only. (C) Scatter plot of experimentally determined  $D_{\text{mobile}}$  diffusion of 12 DNA-binding proteins against their intracellular copy number. The fitted  $D_{\text{mobile}}$  value extracted from a 2 species fit to the histograms of apparent diffusion coefficients,  $D^*$ , presented in Figure 1. The copy number estimates are from literature sources are presented in Table 1. (D) Distributions histograms of apparent diffusion,  $D^*$ , of three DNA-binding proteins: DNA polymerase 1 (Pol1) and RNA polymerase (RNAP) before (left) and after 60 mins treatment with 50  $\mu\text{g/ml}$  rifampicin (right). Distributions are fitted with a 2-species model of immobile (in red) and mobile molecules (in blue).

A

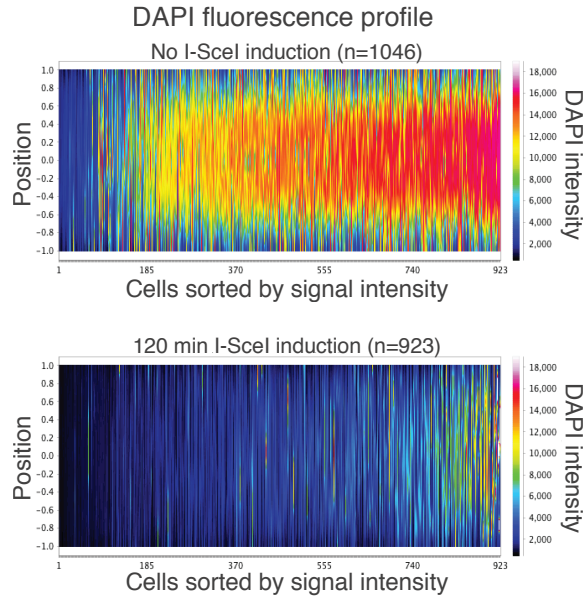

B

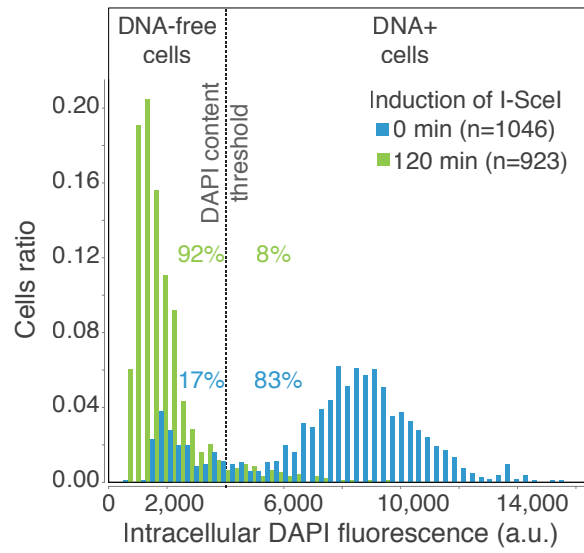

Fig. S2

**Figure S2:** Quantification of DNA degradation efficiency. Related to Fig. 3. (A) Fluorescence profiles show the distribution and intensity of DAPI signal in individual cells normalized by the cell length and sorted from left to right by increasing mean intensity. Fluorescence profile of OT / pSN1( $p_{BAD}$ -*I-SceI*) strain before (Top panel) and 120 min after I-SceI induction (lower panel) are shown. (B) Histograms of DAPI-stained DNA intracellular fluorescence in OT / pSN1(PBADI-SceI) cell population, before (blue bars) and 120 min after I-SceI induction (green bars). The percentages of cells below and above a DAPI content threshold (grey dash line) are shown. Before I-SceI induction, 17 % of cells already exhibit DNA loss likely due to the leakiness I-SceI expression from PBAD promoter. 120 min after arabinose-induced I-SceI expression, this proportion increases to 92 % of the population, with 8 % of cells still containing DNA (n= cells analyzed).

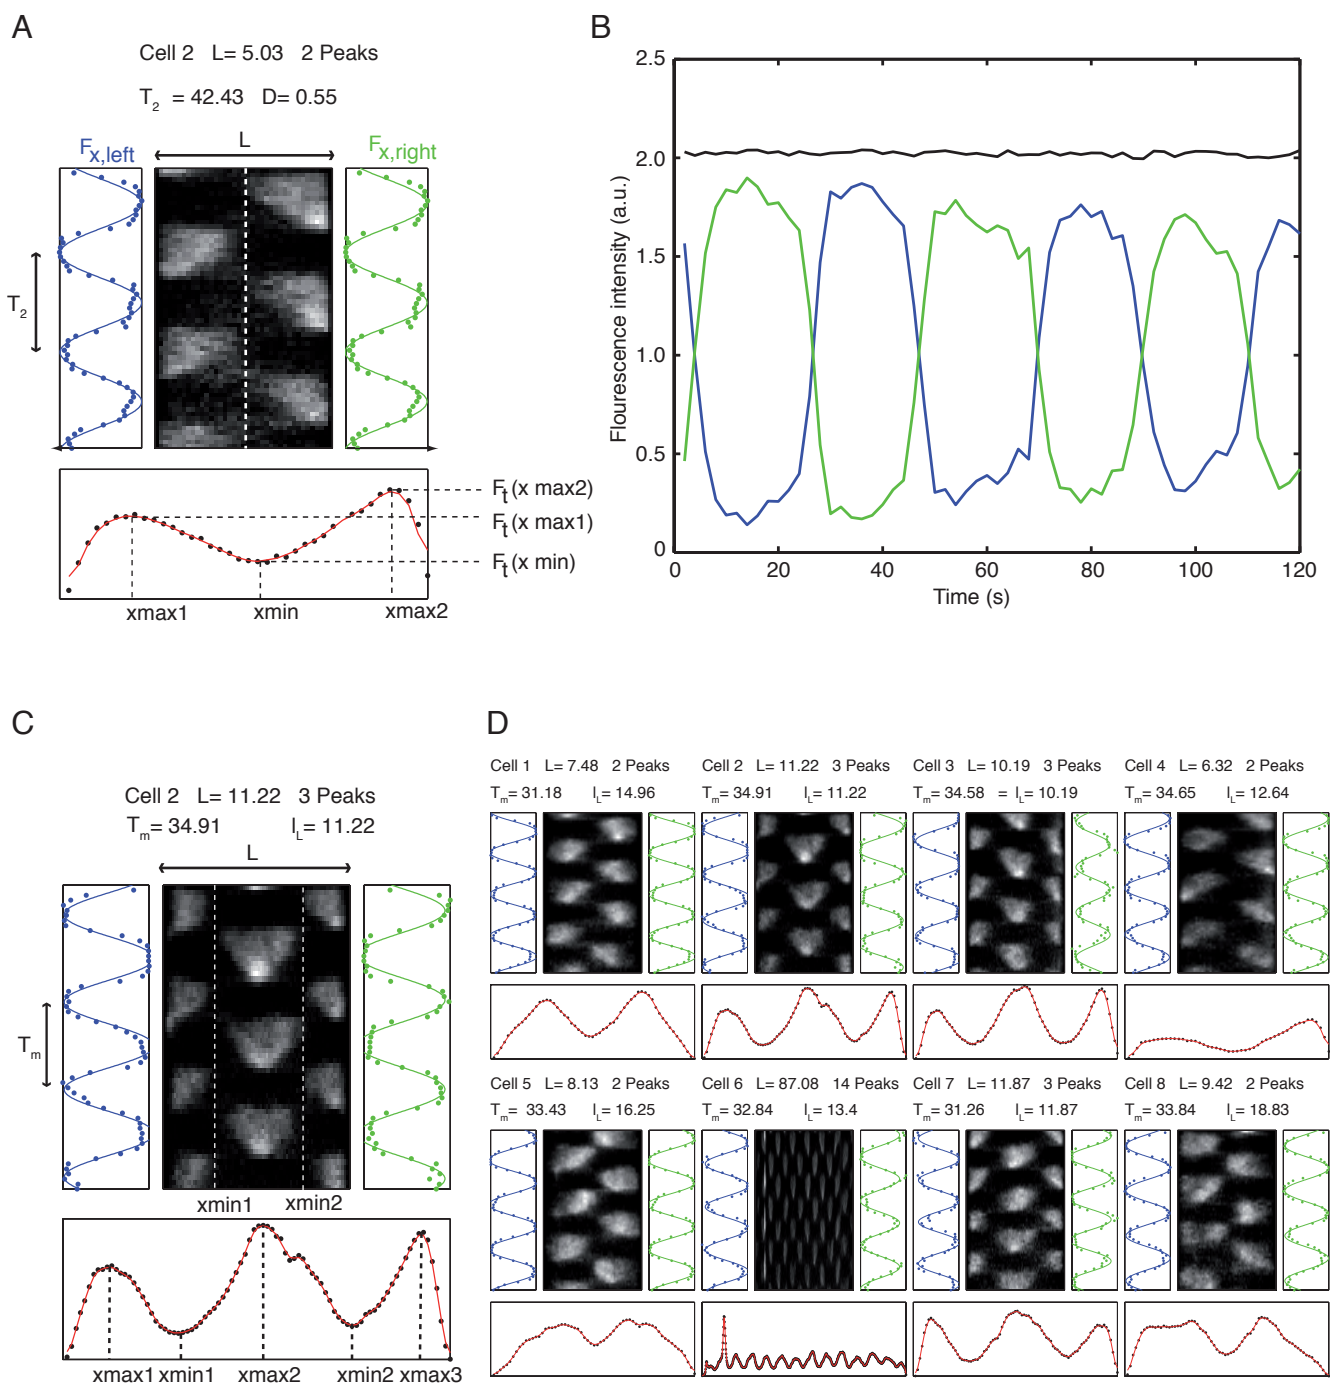

Fig. S3

**Figure S3:** Min oscillation period analysis. Related to Fig. 3E. (A) Kymograph and concentration profiles of the fluorescence signal of MinC protein in exponentially growing *E. coli* cells. The width of the kymograph corresponds to the length  $L$  of the cell. Upon vertical splitting of the kymograph (white dashed line) and integration over space ( $x$ ), the time-dependent intensity signals  $F_{x,\text{left}}(t)$  and  $F_{x,\text{right}}(t)$  are obtained. The oscillation period  $T_2$  can be calculated by periodic fitting (blue and green lines on the left and right of the kymograph). Upon integration over time ( $t$ ), a spatial concentration profile of the MinC proteins is obtained (black data points below the kymograph) and fitted (red curve). The depth  $D$  of the profile is calculated from the heights of the maxima and the minimum. (B) Oscillation of fluorescence over time in cell halves. When the time-dependent fluorescence is integrated, an almost perfect constant line is obtained (black curve). This is due to the normalization of the intensity of each pixel in respect to the total fluorescence signal at each time point. In consequence, the two periodic curves for the left and right kymograph halves are perfectly symmetric (blue and green curve). (C) Kymograph and concentration profiles of the fluorescence signal of MinC protein in filamentous cells. In filamentous cells, the time-averaged concentration profile can show more than two peaks. The distance between two peaks corresponds to half an intrinsic wavelength of the Min system. For the calculation of the oscillation period  $T_m$  in filamentous cells, the kymograph is split along the position of the minima  $x_{\text{min}}$  (white dashed lines in the kymograph) resulting in several stripes with a periodic pattern. Integration along  $x$  provides a periodic functions  $F_{x,i}(t)$  from which oscillation period  $T_i$  can be calculated.  $T_m$  represents the average for these multiple oscillation periods. (D) Kymographs of different filamentous cells show different number of oscillations. Most of them show only a single (cells 1, 4, 5 and 8) or double oscillation (cells 2, 3 and 7). In the given example one cells shows 14 peaks, which corresponds to 13 oscillations and thus 6.5 wavelengths. The respective wavelength can be then calculated from the length of the cell and the number of oscillations.



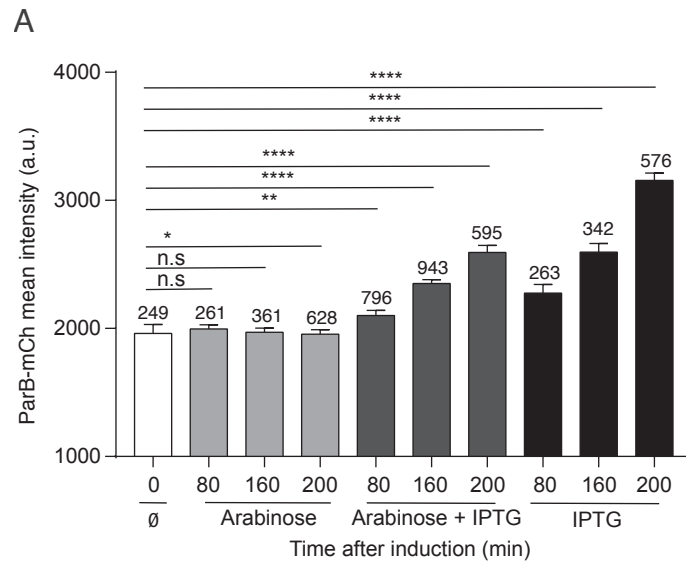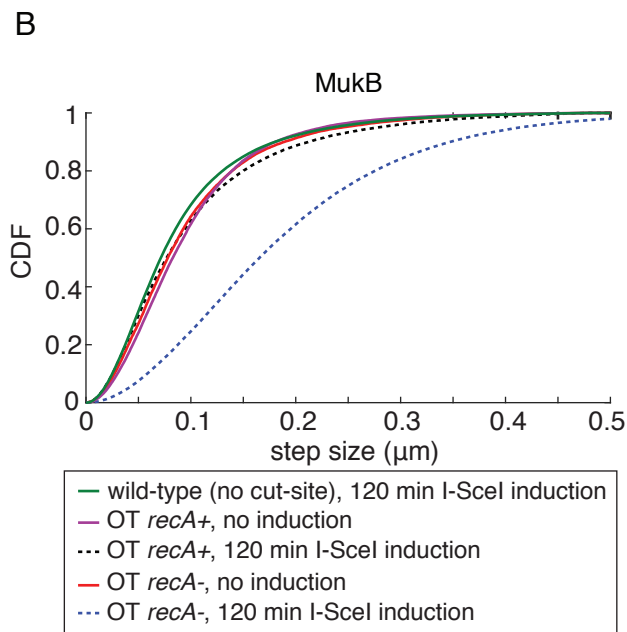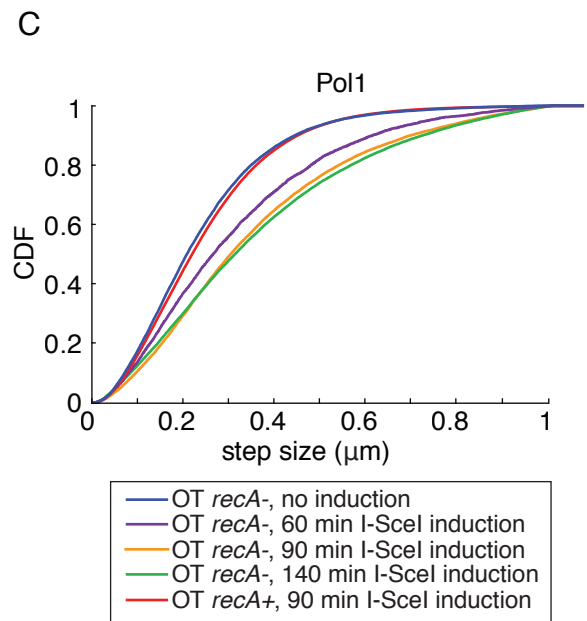

Fig. S4

**Figure S4:** Effects of chromosome degradation on protein production and diffusion. Related to Fig. 3.

(A) Maintenance of protein synthesis activity upon induction of DNA degradation. Quantification of ParB-mCherry intracellular signal (a.u., arbitrary unit) produced from IPTG inducible pSN70 plasmid ( $P_{lac}$  *I-SceI*) in OT strain. I-SceI expression from pSN1 plasmid is induced by arabinose 0.2 %. Chromosome degradation alone has little impact on ParB-mCherry production. Over the course of the experiment (200 minutes), ParB-mCherry production is induced by IPTG with or without chromosome degradation. Error bars indicate the standard error and n = the numbers of cells analyzed. Two tailed P-values from Mann-Whitney non-parametric test are indicated by (n.s) non-significant P-value > 0.05, \* for P-value < 0.05, \*\* for P-value < 0.01 and \*\*\*\* for P-value < 0.001.

(B) Cumulative distribution plot of tracked MukB-PAmCherry trajectory step size in cells before and 120 mins after I-SceI induction. Protein diffusion remains unchanged *recA* proficient cells (*recA*+) before (magenta line) after induction (black dashed line), whereas diffusion increases after induction in *recA*- cells (blue dashed line).

(C) Cumulative distribution plot of tracked Pol1-PAmCherry trajectory step size in (*recA*-) cells before and after I-SceI induction. Protein diffusion increases with I-SceI induction time from 0 to 90 mins, but increases only modestly beyond 90 mins induction.

A

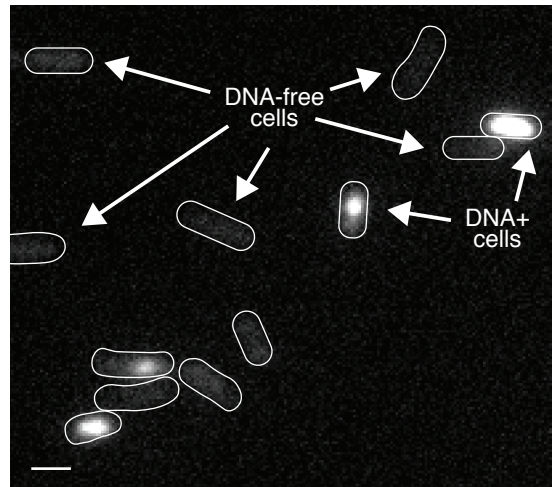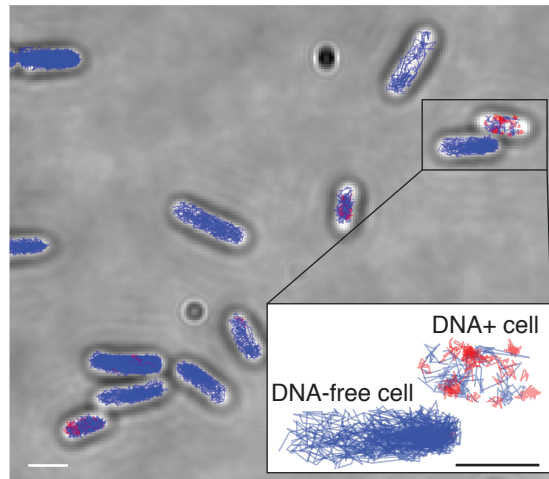

B

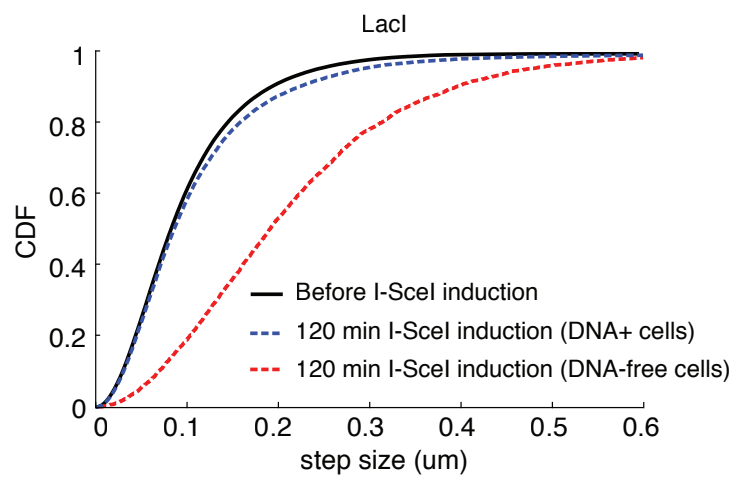

Fig. S5

**Figure S5:** Identification of DNA-free cells. Related to Fig. 3 and 4. A fraction of cells did not undergo full DNA degradation and these cells showed little change in the diffusion profiles. (A) Fluorescence image of SytoGreen stained DNA in cells after 120 mins of I-SceI induction showing DNA+ and DNA-free cells (top). The brightfield image of the same cells overlaid with the categorized trajectories of RNAP-PAmCherry tracks with immobile molecules in red and mobile molecules in blue (bottom). The lower-right insert presents a zoom of one DNA+ and one DNA-free cell. (B) Cumulative distribution of LacI-PAmCherry trajectory displacement steps in cells having high (DNA+ cells in blue) or low (DNA-free cells in red) SytoGreen fluorescence compared to the unperturbed cells (in black).

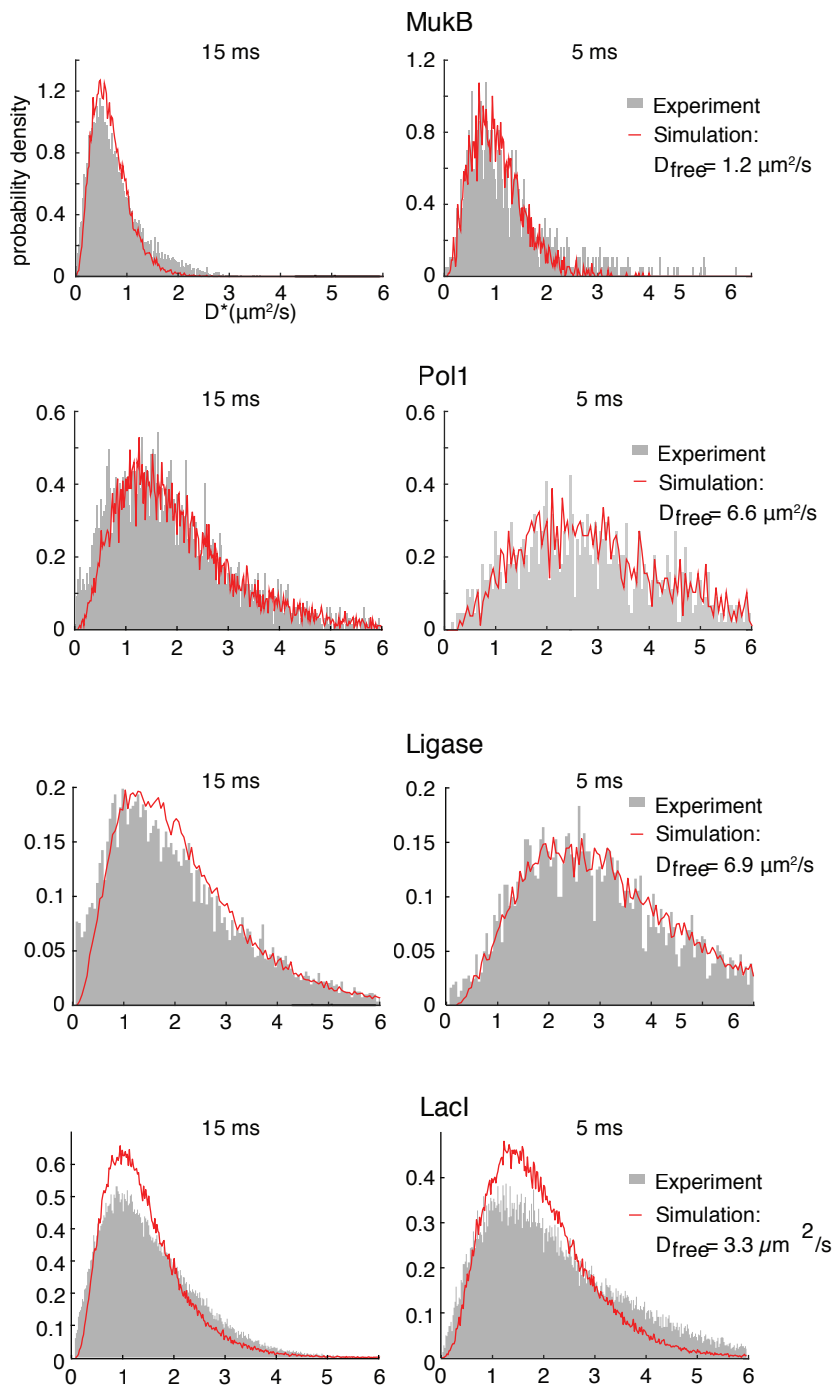

Fig. S6

**Figure S6:** Influence of exposure time. Related to Fig. 6.  $D^*$  distribution (grey bars) of MukB-PAmCherry, Pol1-PAmCherry, LigA-PAmCherry and LacI-PAmCherry in DNA-free cells 120 min after I-SceI induction measured with an exposure time of 15 ms (left) and 5 ms (right). The  $D^*$  distribution generated from simulated molecule trajectories with the same diffusion coefficient,  $D_{\text{free}}$ , at 15 ms (left) and 5 ms (right) exposure times.

**Table S1. Functionality of the tested fusion proteins.** Related to Fig. 1 and Table 1.

| <b>Fusion protein</b>                                   | <b>Functionality tests</b>                                                                                                                                                                                                                                         | <b>Reference</b>                                                            |
|---------------------------------------------------------|--------------------------------------------------------------------------------------------------------------------------------------------------------------------------------------------------------------------------------------------------------------------|-----------------------------------------------------------------------------|
| <b>RNA Polymerase (<math>\beta'</math> subunit)</b>     | The fusion strain shows WT growth rate and cell size. The fusion strain shows expected decrease in DNA binding upon incubation with the transcription inhibiting antibiotic rifampicin.                                                                            | Stracy et al., 2015<br>Endesfelder et al 2013                               |
| <b>DNA polymerase 1 (PolA)</b>                          | The fusion strain shows WT growth rate and cell size. The fusion strain shows WT levels of sensitivity to DNA methylation damage with methyl methanesulfonate (MMS). The fusion protein shows expected increase in DNA binding upon incubation with MMS.           | Uphoff et al., 2013                                                         |
| <b>MukBEF (MukB subunit)</b>                            | The cells have a Muk <sup>+</sup> phenotype with WT growth rate and cell size (Muk <sup>-</sup> cells are temperature sensitive and cannot grow at 37, and generate anucleate cells).                                                                              | Badrinarayanan et al., 2012                                                 |
| <b>DNA Ligase (LigA)</b>                                | The fusion strain shows WT growth rate and cell size, and WT levels of sensitivity to DNA methylation damage with methyl methanesulfonate (MMS). The fusion protein shows expected increase in DNA binding upon incubation with MMS.                               | Uphoff et al., 2013                                                         |
| <b>Lac repressor (LacI)</b>                             | The fusion strain shows WT growth rate and cell size. The fusion strain shows expected decrease in binding upon IPTG addition and in strains with the LacO operator sites removed.                                                                                 | Garza de Leon et al., 2017                                                  |
| <b>Heat Unstable protein (HU)</b>                       | The fusion strain shows WT growth rate and cell size. The <i>hupB-PAmcherry</i> fusion is similar to <i>hupB-mcherry</i> fusion used in Starcy et al., 2015 (same SSAGSAAGSGEF flexible linker).                                                                   | Similar C-ter fusion to <i>hupB</i> such as that used in Starcy et al, 2015 |
| <b>Histone-like nucleoid structuring protein (H-NS)</b> | The fusion strain shows WT growth rate and cell size. The <i>hns-PAmcherry</i> C-term fusion (with SSAGSAAGSGEF linker) is similar to <i>hns-mcherry</i> fusion used in Gao et al., 2017 (with GSAGSAAGSGEF linker).                                               | Similar C-ter fusion to <i>hns</i> as used in Gao et al., 2017              |
| <b>MutS</b>                                             | The fusion strain shows WT growth rate and cell size, and has the same mutation rate as WT strain. The fusion protein shows expected increase in DNA binding upon incubation with MMS mutagen.                                                                     | Uphoff et al., 2016                                                         |
| <b>Topoisomerase IV (ParC subunit)</b>                  | The fusion strain shows WT growth rate and cell size, with no defect in chromosome segregation as assessed by flow cytometry. The fusion protein shows expected increase in DNA binding following incubation with the type II topoisomerase inhibitor norfloxacin. | Zawadzki et al., 2015                                                       |
| <b>UvrA</b>                                             | The fusion strain shows WT growth rate, cell size and WT levels of sensitivity to UV damage. The fusion protein shows expected increase in DNA binding following exposure to UV.                                                                                   | Stracy et al., 2016                                                         |
| <b>DNA gyrase (GyrA subunit)</b>                        | The fusion strain shows WT growth rate and cell size. The purified fusion protein can relax supercoiled DNA in vitro. The fusion protein shows expected increase in DNA binding following incubation with the type II topoisomerase inhibitor norfloxacin.         | Stracy et al., 2019                                                         |

**Table S2. Strains and plasmids used in this study.** Related to the STAR Methods section.

| Strain                               | Relevant Genotype                                                      | Source or Reference                                                                                                          |
|--------------------------------------|------------------------------------------------------------------------|------------------------------------------------------------------------------------------------------------------------------|
| MG1655                               | F- lambda- <i>ilvG- rfb-50 rph-1</i>                                   | CGSC#: 7740                                                                                                                  |
| TB28                                 | MG1655 <i>ΔlacIZYA</i>                                                 | Bernhardt and de Boer, 2005                                                                                                  |
| TB28 <i>I-SceI<sup>CS</sup>-ilvA</i> | TB28 <i>I-SceI<sup>CS</sup>-ilvA-FRT</i> (3953 kb)                     | TB28 × P1. <i>I-SceI<sup>CS</sup>-ilvA</i> to Cm <sup>r</sup> , <i>cat</i> removed via pCP20                                 |
| TB28 <i>I-SceI<sup>CS</sup>-ydeO</i> | TB28 <i>I-SceI<sup>CS</sup>-ydeO-FRT-cat-FRT</i> (1580 kb)             | TB28 × P1. <i>I-SceI<sup>CS</sup>-ydeO</i> to Cm <sup>r</sup>                                                                |
| OT                                   | TB28 <i>I-SceI<sup>CS</sup>-ilvA-FRT, I-SceI<sup>CS</sup>-ydeO-FRT</i> | TB28 <i>I-SceI<sup>CS</sup>-ilvA</i> × P1. <i>I-SceI<sup>CS</sup>-ydeO</i> to Cm <sup>r</sup> , <i>cat</i> removed via pCP20 |
| RNAP-PAmCherry                       | MG1655 <i>rpoC-PAmCherry-FRT-kan-FRT</i>                               | Stracy et al., 2015                                                                                                          |
| HU-PAmCherry                         | MG1655 <i>hupB-PAmCherry-FRT-kan-FRT</i>                               | Stracy et al., 2015                                                                                                          |
| HN-S-PAmCherry                       | MG1655 <i>Hns-PAmCherry-FRT-kan-FRT</i>                                | Stracy et al., 2015                                                                                                          |
| FIS-PAmCherry                        | MG1655 <i>fis-PAmCherry-FRT-kan-FRT</i>                                | Uphoff et al., 2013                                                                                                          |
| LacI-mCherry                         | MG1655 <i>LacI-PAmCherry</i>                                           | Garza de Leon et al., 2017                                                                                                   |
| PolI-PAmCherry                       | MG1655 <i>polA-PAmCherry-FRT-kan-FRT</i>                               | Uphoff et al., 2013                                                                                                          |
| LigA-PAmCherry                       | MG1655 <i>ligA-PAmCherry-FRT-kan-FRT</i>                               | Uphoff et al., 2013                                                                                                          |
| UvrA-PAmCherry                       | MG1655 <i>uvrA-PAmCherry-FRT-kan-FRT</i>                               | Stracy et al., 2016                                                                                                          |
| MutS-PAmCherry                       | MG1655 <i>mutS-PAmCherry-FRT-kan-FRT</i>                               | Uphoff et al., 2016                                                                                                          |
| TopoIV-PAmCherry                     | MG1655 <i>parC-PAmCherry-FRT-kan-FRT</i>                               | Zawadzki et al., 2015                                                                                                        |
| MukB-PAmCherry                       | MG1655 <i>mukB-PAmCherry-FRT-kan-FRT</i>                               | Badrinarayanan et al., 2012                                                                                                  |
| GyrA-PAmCherry                       | MG1655 <i>gyrA-PAmCherry-FRT-kan-FRT</i>                               | Stracy et al., 2019                                                                                                          |
| <i>recA- strain</i>                  | TB28 <i>recAT233C-Tet</i>                                              | Lesterlin et al., 2014                                                                                                       |
| MinC-Ypet                            | <i>minC-Ypet</i>                                                       | Bisicchia et al., 2013                                                                                                       |
| OT RNAP-PAmCherry                    | OT <i>rpoC-PAmCherry-FRT-kan-FRT</i>                                   | OT x P1. RNAP-PAmCherry to Km <sup>r</sup>                                                                                   |
| OT PolI-PAmCherry                    | OT <i>polA-PAmCherry-FRT-kan-FRT</i>                                   | OT x P1. PolI-PAmCherry to Km <sup>r</sup>                                                                                   |
| OT LigA-PAmCherry                    | OT <i>ligA-PAmCherry-FRT-kan-FRT</i>                                   | OT x P1. LigA-PAmCherry to Km <sup>r</sup>                                                                                   |
| OT MukB-PAmCherry                    | OT <i>mukB-PAmCherry-FRT-kan-FRT</i>                                   | OT x P1. MukB-PAmCherry to Km <sup>r</sup>                                                                                   |
| OT LacI-PAmCherry                    | OT / <i>p lacI-PAmCherry</i>                                           | Transformation of <i>p lacI-PAmCherry</i> into OT strain                                                                     |
| OT LacI <sup>41</sup> -PAmCherry     | OT / <i>p lacI<sup>41</sup>-PAmCherry</i>                              | Transformation of <i>p lacI<sup>41</sup>-PAmCherry</i> into OT strain                                                        |
| OT Free PAmCherry                    | OT pBAD\HisB PAmCherry1                                                | Transformation of pBAD\HisB PAmCherry into OT strain                                                                         |
| OT FIS-PAmCherry                     | OT <i>fis-PAmCherry-FRT-kan-FRT</i>                                    | OT x P1. FIS-PAmCherry to Km <sup>r</sup>                                                                                    |
| OT <i>recA-</i>                      | OT <i>recAT233C-Tet</i>                                                | OT x P1. <i>recAT233C-Tet</i> to Tc                                                                                          |
| OT RNAP-PAmCherry <i>recA-</i>       | OT <i>rpoC-PAmCherry-FRT-kan-FRT</i>                                   | OT RNAP-PAmCherry x P1. <i>recAT233C-Tet</i> to Tc                                                                           |
| OT PolI-PAmCherry <i>recA-</i>       | OT <i>polA-PAmCherry-FRT-kan-FRT</i>                                   | OT PolI-PAmCherry x P1. <i>recAT233C-Tet</i> to Tc                                                                           |
| OT LigA-PAmCherry <i>recA-</i>       | OT <i>ligA-PAmCherry-FRT-kan-FRT</i>                                   | OT LigA-PAmCherry x P1. <i>recAT233C-Tet</i> to Tc                                                                           |



|                                                    |                                                                             |                                                                              |
|----------------------------------------------------|-----------------------------------------------------------------------------|------------------------------------------------------------------------------|
| <b>OT MukB-PAmCherry <i>recA</i>-</b>              | OT <i>mukB-PAmCherry-FRT-kan-FRT</i>                                        | OT MukB-PAmCherry x P1. <i>recAT233C-Tet</i> to Tc to Km <sup>r</sup>        |
| <b>OT LacI-PAmCherry <i>recA</i>-</b>              | OT / <i>P lacI-PAmCherry</i>                                                | Transformation of <i>P lacI-PAmCherry</i> into OT <i>recA</i> -              |
| <b>OT LacI<sup>41</sup>-PAmCherry <i>recA</i>-</b> | OT / <i>P lacI<sup>41</sup>-PAmCherry</i>                                   | Transformation of <i>P lacI<sup>41</sup>-PAmCherry</i> into OT <i>recA</i> - |
| <b>OT Free PAmCherry <i>recA</i>-</b>              | OT pBAD\HisB PAmCherry1                                                     | Transformation of pBAD\HisB PAmCherry1 into OT <i>recA</i> - strain          |
| <b>Plasmids</b>                                    |                                                                             |                                                                              |
| <b>p <i>lacI-PAmCherry</i></b>                     | LacI-PAmCherry producing plasmid                                            | Garza de Leon et al., 2017                                                   |
| <b>p <i>lacI<sup>41</sup>-PAmCherry</i></b>        | LacI <sup>41</sup> -PAmCherry producing plasmid                             | Garza de Leon et al., 2017                                                   |
| <b>pBAD\HisB PAmCherry1</b>                        | PAmCherry1 producing plasmid                                                | Endesfelder et al., 2013                                                     |
| <b>pCP20</b>                                       | Flp expression plasmid                                                      | Datsenko et al., 2000                                                        |
| <b>p<i>ParBmCherry</i> (pSN70)</b>                 | IPTG inducible expression of N-terminal fusion mCherry-ParB <sub>PMT1</sub> | Nolivos et al., 2019                                                         |
| <b>pI-SceI (pSN1)</b>                              | Arabinose inducible expression of I-SceI endonuclease                       | Gift from Sophie Nolivos                                                     |
